# Supplementary material
Source: PubMed Central journal article supplement (PMC6397663)
Supplement: NIHMS1518803-supplement-1.pdf [file NIHMS1518803-supplement-1.pdf]

**Table S1: Comparisons of IHC scores in 41 human paired colorectal adenomas, CRC tumor centers and CRC invasive fronts**

| Groups                                | PPARD*       | total active $\beta$ -catenin* | nuclear $\beta$ -catenin* | EIF4G1*      | nuclear CDK1* |
|---------------------------------------|--------------|--------------------------------|---------------------------|--------------|---------------|
| CRC > Adenoma <sup>#</sup>            | 79.5 (31/39) | 76.9 (30/39)                   | 35.9 (14/39)              | 89.7 (35/39) | 97.4 (38/39)  |
| Tumor center > Adenoma <sup>#</sup>   | 69.2 (27/39) | 71.8 (28/39)                   | 28.2 (11/39)              | 87.2 (34/39) | 97.4 (38/39)  |
| Invasive front > Adenoma <sup>#</sup> | 79.5 (31/39) | 76.9 (30/39)                   | 35.9 (14/39)              | 89.7 (35/39) | 92.3 (36/39)  |
| Invasive front > Tumor center         | 34.1 (14/41) | 24.4 (10/41)                   | 22.0 (9/41)               | 51.2 (21/41) | 29.3 (13/41)  |

\*: percentage of examined cases. Numbers of cases are listed in parentheses.

<sup>#</sup>: Two cases out of total 41 cases had no adenoma lesions in the examined slides

**Table S2: Gene expression upregulation in CRC invasive fronts versus paired CRC tumor centers in relation to nuclear  $\beta$ -catenin localization**

| Groups                                                           | nuclear $\beta$ -catenin* | PPARD*       | EIF4G1*      | nuclear CDK1* |
|------------------------------------------------------------------|---------------------------|--------------|--------------|---------------|
| All cases (41)                                                   | 22.0 (9/41)               | 34.1 (14/41) | 51.2 (21/41) | 29.3 (13/41)  |
| without nuclear $\beta$ -catenin localization in invasive fronts | N/A                       | 40.6 (13/32) | 53.1 (17/32) | 31.3 (10/32)  |

\*: percentage of examined cases. Numbers of cases are listed in parentheses.
