# Supplementary material
Source: PubMed Central journal article supplement (PMC6397663)
Supplement: NIHMS1518803-supplement-2.pdf [file NIHMS1518803-supplement-2.pdf]

## SUPPLEMENTARY METHODS

### Antibodies

The antibodies used in this study are summarized in the following table:

| Name                                                          | Company                  | Catalog number | Application          |
|---------------------------------------------------------------|--------------------------|----------------|----------------------|
| Rb anti-BMP7 mAb                                              | Abcam                    | ab129156       | WB (hs/mm), IHC (mm) |
| Rb anti-PPARD pAb                                             | Abcam                    | ab8937         | WB (mm)              |
| Rb anti-PPARD pAb                                             | Santa Cruz Biotechnology | sc-7197        | WB (hs)              |
| Mm anti- $\beta$ -actin mAb                                   | Santa Cruz Biotechnology | sc-47778       | WB (hs/mm)           |
| Rb anti-p38 MAPK mAb                                          | Cell Signaling           | 9212           | WB (hs/mm)           |
| Rb anti-phospho p38 MAPK(T180/Y182) mAb                       | Cell Signaling           | 9211           | WB (hs/mm)           |
| Rb anti-phospho S6(S235/236) mAb                              | Cell Signaling           | 4858           | WB (hs/mm), IHC (mm) |
| Rb anti-GSK3 $\beta$ (S9) mAb                                 | Cell Signaling           | 12456          | WB (mm)              |
| Rb anti-PDGFR $\beta$ mAb                                     | Cell Signaling           | 3169           | WB (mm)              |
| Rb anti-AKT1 mAb                                              | Cell Signaling           | 75692          | WB (hs/mm)           |
| Rb anti-phospho AKT1(S473) mAb                                | Cell Signaling           | 9018           | WB (hs/mm)           |
| Rb anti-AKT2 mAb                                              | Cell Signaling           | 3063           | WB (mm)              |
| Rb anti-active $\beta$ -catenin(non phospho) mAb              | Cell Signaling           | 8814           | WB (hs/mm), IHC (hs) |
| Rb anti-TAK1 mAb                                              | Cell Signaling           | 5206           | WB (hs/mm)           |
| Rb anti-phospho TAK1(T184/187) mAb                            | Cell Signaling           | 4531           | WB (hs/mm), IHC (mm) |
| Rb anti-CDK1 pAb                                              | Cell Signaling           | 77055          | WB (mm)              |
| Rb anti-EIF4G pAb                                             | Cell Signaling           | 2498           | WB (mm), IHC (hs)    |
| Mm anti-DDK mAb                                               | OriGene                  | TA50011        | WB, ChIP (hs)        |
| Rb anti-Ki-67 mAb                                             | Thermo Fisher            | RM-9106-S1     | IHC (mm)             |
| Rb anti-E-Cadherin oligoclonal Ab                             | Thermo Fisher            | 710161         | IF (mm)              |
| Mm anti- $\alpha$ -SMA mAb                                    | Sigma-Aldrich            | A5228          | IF (mm)              |
| Mm anti-rRNA(Y10b) mAb                                        | Santa Cruz Biotechnology | sc-33678       | IF (mm)              |
| Rb anti-PPARD pAb                                             | Aviva Systems Biology    | ARP38765_T100  | IHC (hs)             |
| Rb anti-CDK1 pAb                                              | Sigma-Aldrich            | HPA003387      | IHC (hs)             |
| Rb anti- $\beta$ -catenin mAb                                 | Cell Signaling           | 8480           | IHC (mm)             |
| Gt anti-M IgG, HRP-linked Ab                                  | Cell Signaling           | 7076           | WB, IHC              |
| Gt anti-Rb IgG, HRP-linked Ab                                 | Cell Signaling           | 7074           | WB, IHC              |
| Gt anti-Rb IgG (H+L) Secondary Ab, Alexa Fluor® 594 conjugate | Thermo Fisher            | A-11012        | IF (mm)              |
| Gt anti-Mm IgG (H+L) Secondary Ab, Alexa Fluor® 488 conjugate | Thermo Fisher            | A-11029        | IF (mm)              |

|                         |                          |         |           |
|-------------------------|--------------------------|---------|-----------|
| Mm IgG negative control | Santa Cruz Biotechnology | sc-2762 | ChIP (hs) |
|-------------------------|--------------------------|---------|-----------|

Abbreviations: mm=mouse; hs=human; gt=goat; rb=rabbit; mAb=monoclonal antibody; pAb=polyclonal antibody; IHC=immunohistochemistry; IF=immunofluorescence; ChIP=chromatin immunoprecipitation

## IHC and IF staining

IHC staining and IF staining were performed, and composite expression scores (CES) for IHC were recorded as described before (1).

## Generation of stable PPARD-overexpressed cell lines

PPARD-overexpressed HCT116 cell clones were generated as described before (1). Lentivirus plasmids for human PPARD ORF (Cat# RC214735L3, OriGene), mouse PPARD ORF (Cat# MR207001L3, OriGene) in pLenti-C-myc-DDK-P2A-Puro, and control plasmid pLenti-C-Myc-DDK-P2A-Puro (Cat# PS100092, OriGene) were packaged into lentivirus particles at MD Anderson's shRNA and ORFeome Core Facility. Human (HCT116 and SW480) or mouse (CT26) CRC cells were transduced by lentiviral particles (10 MOIs for all lentiviruses) with hexadimethrine bromide (8  $\mu\text{g}/\text{mL}$ ). After 12 hours, the culture medium was replaced with fresh medium containing puromycin (0.8  $\mu\text{g}/\text{mL}$  for HCT116, 4  $\mu\text{g}/\text{mL}$  for SW480 and CT26). The medium was changed once every 72 hours. Clones with stable transduction were isolated and expanded for further analyses.

## siRNA transfection

SW480 cells were cultured to 40% to 50% confluence and then transfected with 30 nM of 2 independent ON-TARGETplus PPARD siRNAs (Dharmacon) or control siRNA (Dharmacon) using Lipofectamine RNAiMAX (Invitrogen). The cells were harvested 48 hours after siRNA transfection for further analyses.

## RNA extraction and quantitative real-time polymerase chain reaction

Total RNA extraction and quantitative real-time polymerase chain reaction (qRT-PCR) were performed as described previously (1). The relative RNA expression levels were normalized to the expression of mouse ACTB or human HPRT1 (Applied Biosystems) and calculated using a comparative threshold cycle method (ddC<sub>t</sub>). TaqMan expression probes' information for qRT-PCR is summarized in the following table:

| Name                                                | Company                          | Catalog number or assay ID |
|-----------------------------------------------------|----------------------------------|----------------------------|
| human HPRT(VIC/MGB)<br>endogenous control           | Thermo Fisher/Applied Biosystems | 4326321E                   |
| human c-Myc(FAM/MGB)                                | Thermo Fisher/Applied Biosystems | Hs00905030_m1              |
| human BMP7(FAM/MGB)                                 | Thermo Fisher/Applied Biosystems | Hs00233476_m1              |
| human AKT1(FAM/MGB)                                 | Thermo Fisher/Applied Biosystems | Hs00178289_m1              |
| human PPARD(FAM/MGB)                                | Thermo Fisher/Applied Biosystems | Hs00987011_m1              |
| human EIF4G1(FAM/MGB)                               | Thermo Fisher/Applied Biosystems | Hs00191933_m1              |
| human CDK1(FAM/MGB)                                 | Thermo Fisher/Applied Biosystems | Hs00938777_m1              |
| mouse PPARD(FAM/MGB)                                | Thermo Fisher/Applied Biosystems | Mm01331626_m1              |
| mouse BMP7(FAM/MGB)                                 | Thermo Fisher/Applied Biosystems | Mm00432102_m1              |
| mouse AKT1(FAM/MGB)                                 | Thermo Fisher/Applied Biosystems | Mm01331626_m1              |
| mouse AKT2(FAM/MGB)                                 | Thermo Fisher/Applied Biosystems | Mm02026778_g1              |
| mouse $\beta$ -actin(FAM/MGB)<br>endogenous control | Thermo Fisher/Applied Biosystems | Mm02619580_g1              |
| mouse CDK1(FAM/MGB)                                 | Thermo Fisher/Applied Biosystems | Mm00772472_m1              |
| mouse Axin2(FAM/MGB)                                | Thermo Fisher/Applied Biosystems | Mm00443610_m1              |
| mouse c-Myc(FAM/MGB)                                | Thermo Fisher/Applied Biosystems | Mm00487804_m1              |
| mouse cyclin D1(FAM/MGB)                            | Thermo Fisher/Applied Biosystems | Mm00432359_m1              |
| mouse PDGFR $\beta$ (FAM/MGB)                       | Thermo Fisher/Applied Biosystems | Mm00435546_m1              |

### Chromatin immunoprecipitation-quantitative PCR assay

Chromatin immunoprecipitation (ChIP) and subsequent q-PCR experiments were performed as described before (1). We used mouse IgG (Cat# sc-2762, Santa Cruz Biotechnology) as a negative control. The indicated gene promoters (-2000 to +500 bp, transcription start site was set as 0) were submitted to the online tool Genomatix MatInspector (<https://www.genomatix.de/>), and the calculated PPAR binding sites with matrix scores over 0.75 were considered significant. The following primers to amplify DNA fragments that contained each predicted PPARD binding site (pPDBS) were used: BMP7 (q-PCR amplicon's size: 256 bp): 5'-CAGCAATTCCAGACAGCAAG-3' (sense), 5'-

CCCCTCAGTCCCTGTATCCT-3' (antisense); AKT1 (q-PCR amplicon's size: 127 bp): 5'-GTTGTCCGGAGGAACTTCTGG-3' (sense), reverse 5'-AAGTCCACTGGGAGGCAGAT-3' (antisense). Input from each cell line was used as an endogenous control, and the relative enrichment level of IgG and DDK was calculated as  $2^{-\Delta Ct}$ . To assess the relative binding activity of PPAR $\alpha$  to the bone morphogenetic protein 7 (BMP7) or AKT1 promoter region, relative enriched DDK-PPAR $\alpha$  values were calculated and normalized to IgG readings.

### **Cell migration and invasion assay**

Cell migration and invasion assays were performed as described before (1). Briefly, for migration assay, equal numbers of cells in the culture medium with 0.5% FBS were plated on the tops of the well inserts (8.0- $\mu$ m pore, Corning), and the same medium mixed with a chemical compound (1  $\mu$ M DMPQ [R&D systems], PDGFR $\beta$  inhibitor; 1  $\mu$ M MK2206 [Apexibio], AKT inhibitor; or 8  $\mu$ M RO-3306 [Sigma], CDK1 inhibitor) or solvent control was added to the lower compartment of the wells. After 36~48 hours of incubation, cells are stained and counted. The invasion assay was similar to the migration assay, except the cells in the invasion assay were placed in the top insert, and the insert membrane was coated with 100  $\mu$ L of growth factor-reduced Matrigel (Corning). GSK3787 (1  $\mu$ M, Sigma; a PPAR $\alpha$  antagonist) or 4EGI-1 (50  $\mu$ M, R&D Systems; an EIF4G1 inhibitor) was added to the lower compartment of the wells for the cell invasion assay.

### **$\beta$ -catenin/TCF reporter assays**

Cells were transfected with either pMegaTOP-flash reporter plasmid (14 WT TCF binding elements: CTTTGAT) or pMegaFOP-flash reporter plasmid (8 mutant TCF binding elements: CAAAGGG), and luciferase activity was measured as described previously (2).

### **Reference**

1. Zuo X, Xu W, Xu M, Tian R, Moussalli MJ, Mao F, *et al.* Metastasis regulation by PPAR $\alpha$  expression in cancer cells. *JCI Insight* **2017**;2:e91419

2. Park J-I, Venteicher AS, Hong JY, Choi J, Jun S, Shkreli M, *et al.* Telomerase modulates Wnt signalling by association with target gene chromatin. *Nature* **2009**;460:66-72
