# Supplementary material
Source: PubMed Central journal article supplement (PMC6397663)
Supplement: NIHMS1518803-supplement-3.pdf [file NIHMS1518803-supplement-3.pdf]

Figure S1

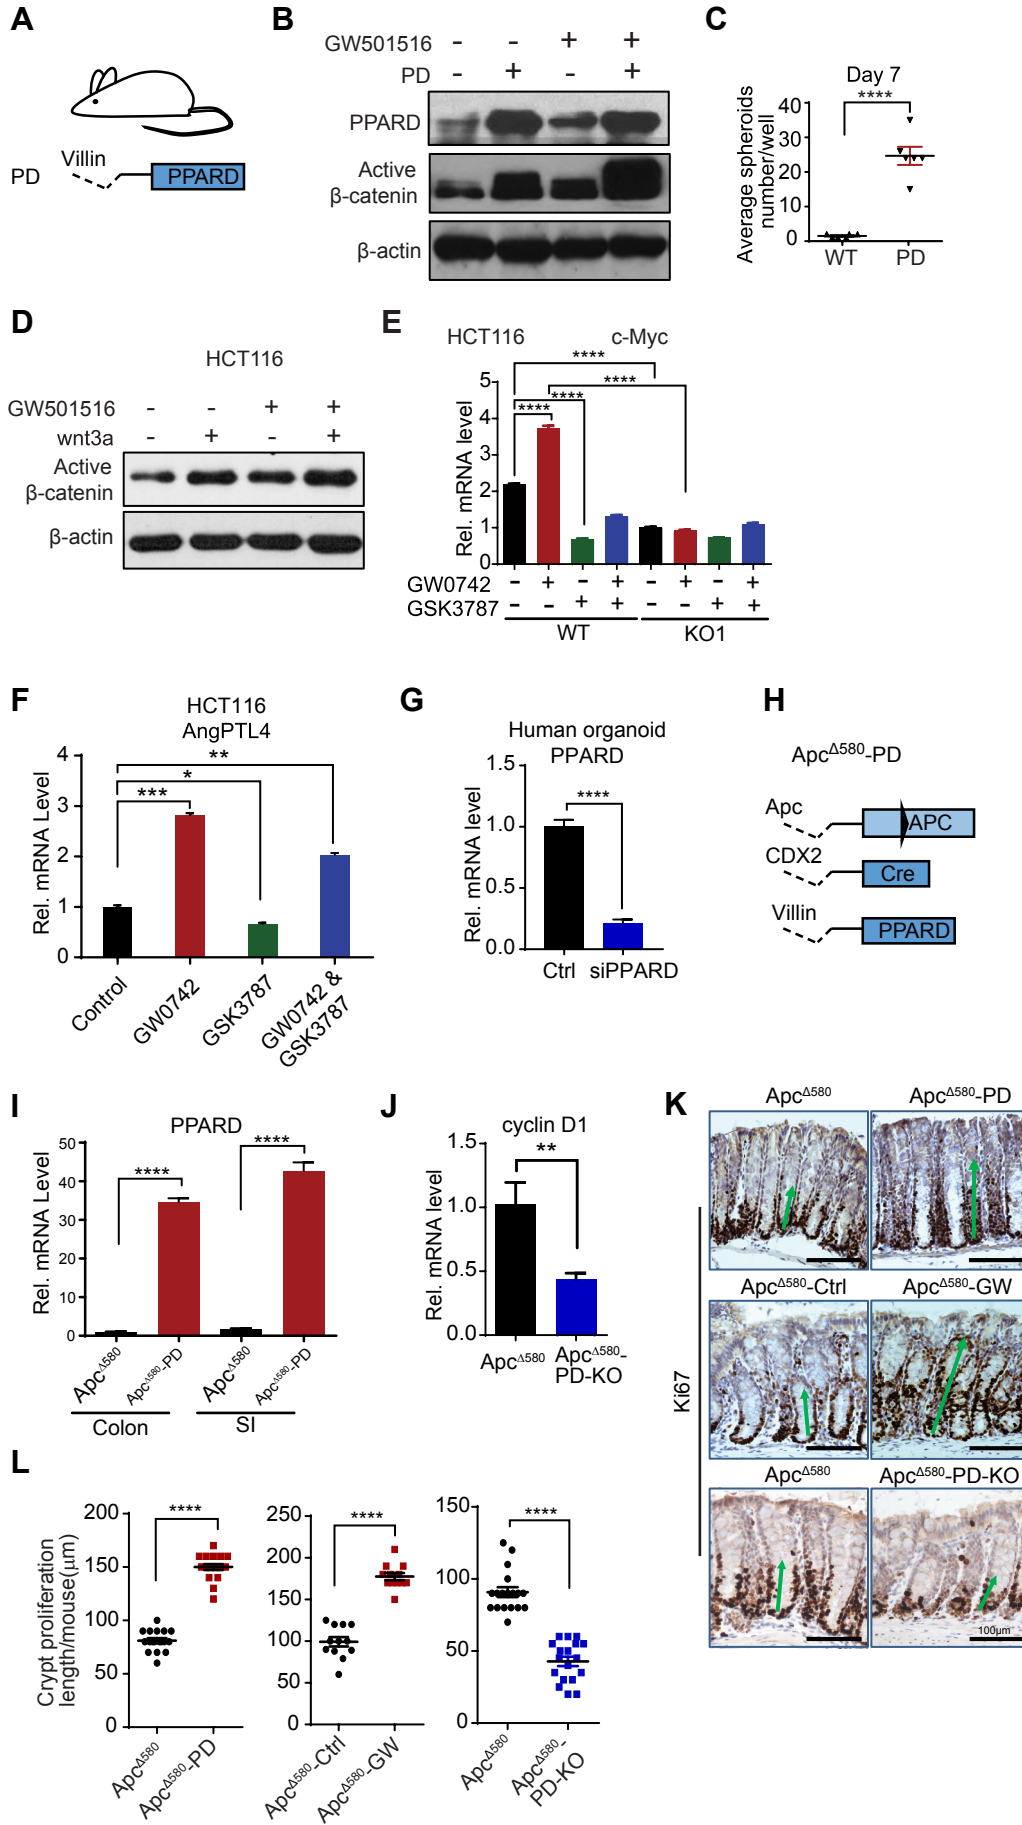

## Figure S1

PPARD increases active  $\beta$ -catenin protein expression. **A**, Schematic diagram of villin-PPARD (PD) mice. Dash lines indicate the promoter region, followed by the PPARD gene coding region. **B**, WT and PD mice at 6 weeks were fed with a PPARD agonist GW501516 (50mg/kg) diet or a control diet for 4 weeks. PPARD and active  $\beta$ -catenin protein levels in IECs were analyzed by Western blot. **C**, The organoid-initiating capacity of IECs derived from PD mice and WT littermates at 10 weeks ( $n = 6$  per group). Organoid numbers per well were presented. **D**, Active  $\beta$ -catenin protein level in HCT116 cells treated with wnt3a (100  $\mu$ M) and/or PPARD agonist GW501516 (1  $\mu$ M) for 24 hours, measured by Western blot. **E**, c-Myc mRNA expression levels in HCT116 WT and KO1 cells treated by PPARD agonist GW0742 (1  $\mu$ M) and/or PPARD antagonist GSK3787 (1  $\mu$ M) for 24 hours, measured by qRT-PCR. **F**, AngPTL4 mRNA expression levels in HCT116 cells treated by GW0742 and/or GSK3787 as described in panel E. **G**, PPARD mRNA level in human organoid cells transfected with control siRNA (Ctrl) or PPARD siRNA (siPPARD) for 48 hours. **H**, Schematic diagram of  $Apc^{\Delta 580}$ -PD mice. PD mice were bred with  $Apc^{\Delta 580}$ -flox; CDX2-Cre mice to generate  $Apc^{\Delta 580}$ -flox;CDX2-Cre;PD ( $Apc^{\Delta 580}$ -PD) mice. Dash lines indicate the promoter region, followed by the indicated gene coding regions. **I**, PPARD mRNA expression levels of colon and small intestinal (SI) IECs from  $Apc^{\Delta 580}$ -PD and  $Apc^{\Delta 580}$  mice were measured by qRT-PCR. **J**, Expression level of cyclin D1 mRNA in IECs from  $Apc^{\Delta 580}$  and  $Apc^{\Delta 580}$ -PD-KO mice. **K and L**, Representative images of Ki-67 IHC (**K**) and corresponding colonic crypt proliferation zone lengths (**L**) of normal colons of the indicated mice. Data are shown as mean  $\pm$  SEM. \* $P < 0.05$ ; \*\* $P < 0.01$ ; \*\*\* $P < 0.001$ ; and \*\*\*\* $P < 0.0001$ .



## Figure S2

PPARD promoted intestinal tumorigenesis in multiple APC mutant mouse models. **A**, Schematic diagram of the multiple transgenic mouse models. PD mice were bred with  $Apc^{min}$ , or  $Apc^{\Delta580}$ -flox; CDX2-Cre or  $Apc^{\Delta580}$ -flox;CDX2-Cre/ERT2 mice to generate  $Apc^{min}$ -PD (Row#1);  $Apc^{\Delta580}$ -PD(Row#2);  $Apc^{\Delta580}$ -TMX-PD(Row#3) mice, respectively. PD-flox mice were bred with  $Apc^{\Delta580}$ -flox; CDX2-Cre to generate  $Apc^{\Delta580}$ -PD-KO (Row#4). Dash lines indicate the promoter region, followed by the indicated gene coding regions. **B-E**, Representative images of fresh colons (**B, top**), colonic tumor numbers per mouse (**B, bottom**), representative images of formalin-fixed distal small intestines (**C**), colon length (**D**) and weight (**E**) per mouse for wild type (WT),  $Apc^{\Delta580}$  and  $Apc^{\Delta580}$ -PD mice at age 14 weeks. **F and G**,  $Apc^{\Delta580}$  mice at age 4 weeks were fed with GW501516 (50mg/kg) or control diet for 10 weeks. Representative images of fresh colons (**F, left**), colonic tumor numbers per mouse (**F, right**) and representative images of fresh distal small intestines (**G**) for  $Apc^{\Delta580}$  mice treated with GW501516 ( $Apc^{\Delta580}$ -GW) or control ( $Apc^{\Delta580}$ -Ctrl) diet. **H**,  $Apc^{\Delta580}$ -TMX and  $Apc^{\Delta580}$ -TMX-PD littermates were treated with tamoxifen at age 6 weeks and then followed up for another 55 weeks. Representative images of fresh colons (left) and colonic tumor numbers per mouse (right) for  $Apc^{\Delta580}$ -TMX and  $Apc^{\Delta580}$ -TMX-PD mice. Data are shown as mean  $\pm$  SEM. \* $P < 0.05$ ; \*\* $P < 0.01$ ; and \*\*\* $P < 0.001$ .

Figure S3

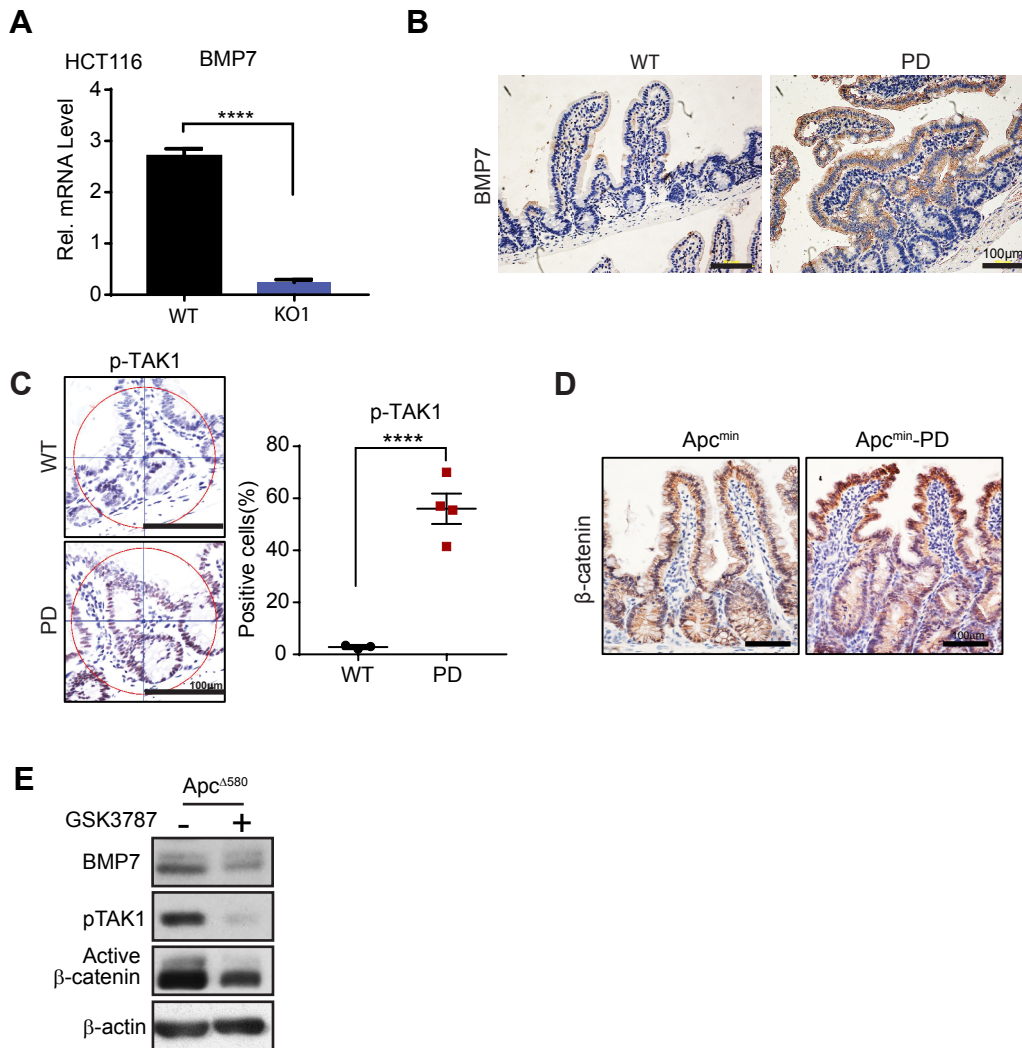

**Figure S3**

PPARD increases BMP7/active  $\beta$ -catenin expression. **A**, The BMP7 mRNA expression levels in HCT116 WT and KO1 cells from RNA-Seq data analysis. **B and C**, BMP7 (**B**) and p-TAK1(**C**) expressions were measured by immunohistochemistry staining in intestinal sections from WT and PD littermates at age 10 weeks. The average percentage of positively-stained p-TAK1 cells obtained from 20 glands were presented. **D**, Active  $\beta$ -catenin expression were measured by immunohistochemistry staining in intestinal sections from the Apc<sup>min</sup> and Apc<sup>min</sup>-PD mice at 8 weeks. **E**, BMP7, p-TAK1 and active  $\beta$ -catenin protein levels in IECs of Apc<sup>Δ580</sup> mice fed with PPARD antagonist GSK3787 (200mg/kg) diet or control diet for 12 weeks were analyzed by Western blot. Data are shown as mean  $\pm$  SEM. \*\*\*\* $P < 0.0001$ .

Figure S4

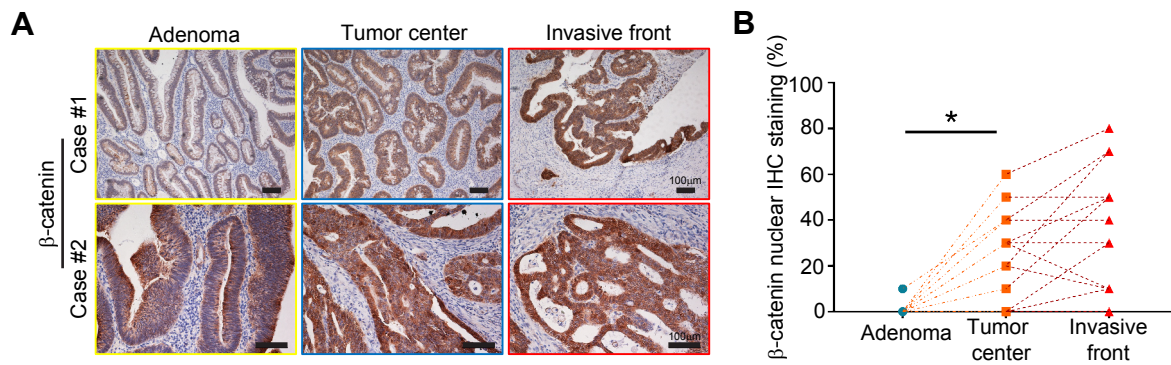

Figure S4

Active  $\beta$ -catenin expression in human colorectal cancer invasive fronts. **A**, Representative active  $\beta$ -catenin IHC staining images of human paired colorectal adenomas (Adenoma), CRC tumor centers (Tumor center), and cancer invasive fronts (Invasive front) of 2 patients. **B**, The percentage of positive nuclear active  $\beta$ -catenin staining for the paired adenomas, CRC tumor centers, and invasive fronts as described in Figure 4E (n = 41 patients). Data are shown as mean  $\pm$  SEM. \* $P < 0.05$ .

Figure S5

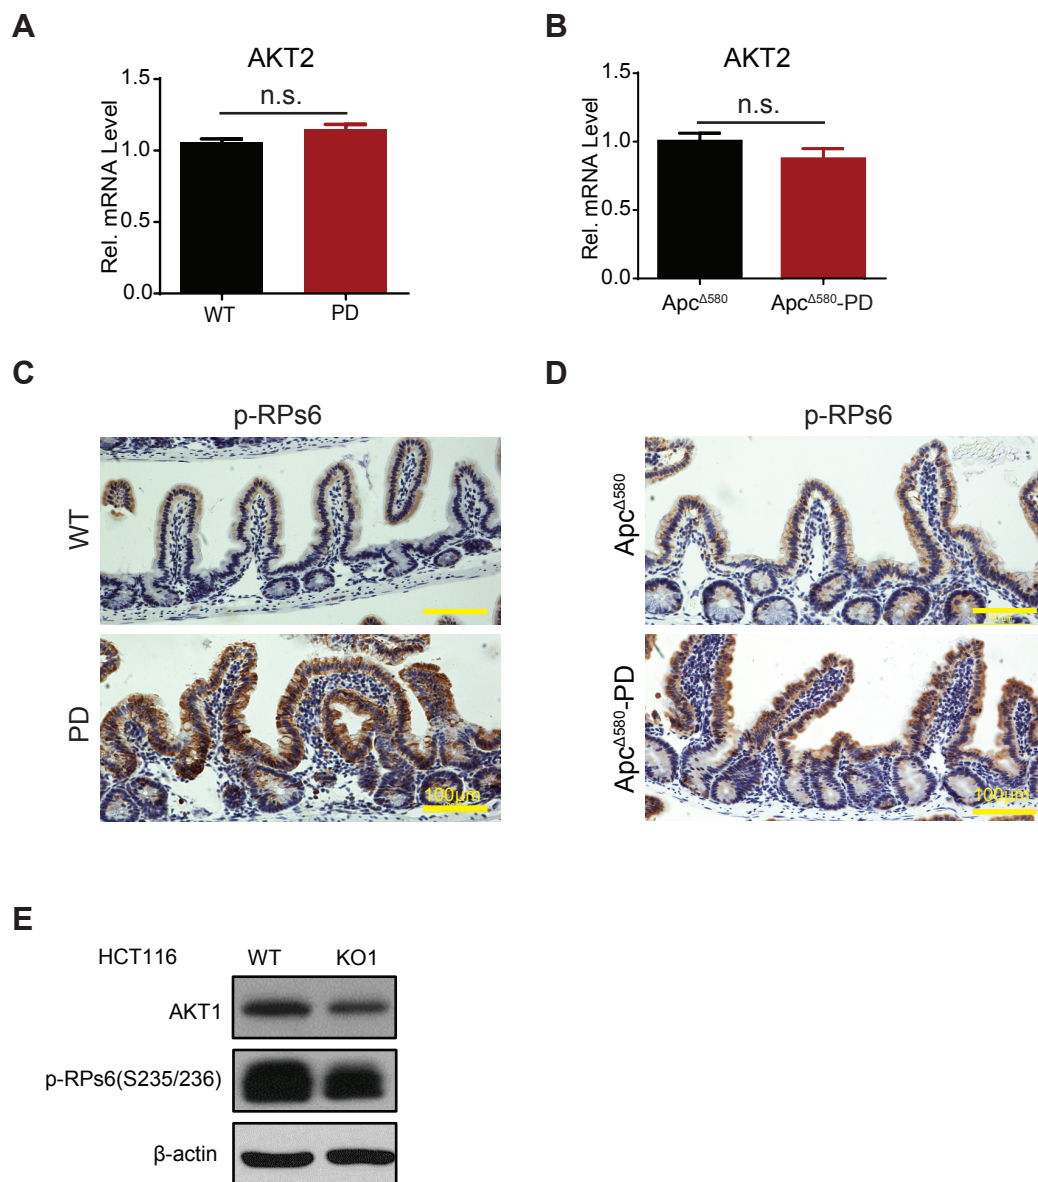

**Figure S5**

PPARD upregulated AKT1/p-rpS6 signaling pathway. **A and B**, AKT2 mRNA expression levels for IECs from WT and PD (**A**) or Apc<sup>Δ580</sup> and Apc<sup>Δ580</sup>-PD (**B**) mice were measured by qRT-PCR. **C and D**, IHC results of p-rpS6 (S235/236) for the intestines from WT and PD (**C**) or Apc<sup>Δ580</sup> and Apc<sup>Δ580</sup>-PD (**D**) mice. **E**, AKT1 and p-rpS6 (S235/236) protein expression levels in parental HCT116 WT and KO1 cells were measured by Western blot. Data are shown as mean ± SEM. n.s.: no significant difference.

Figure S6

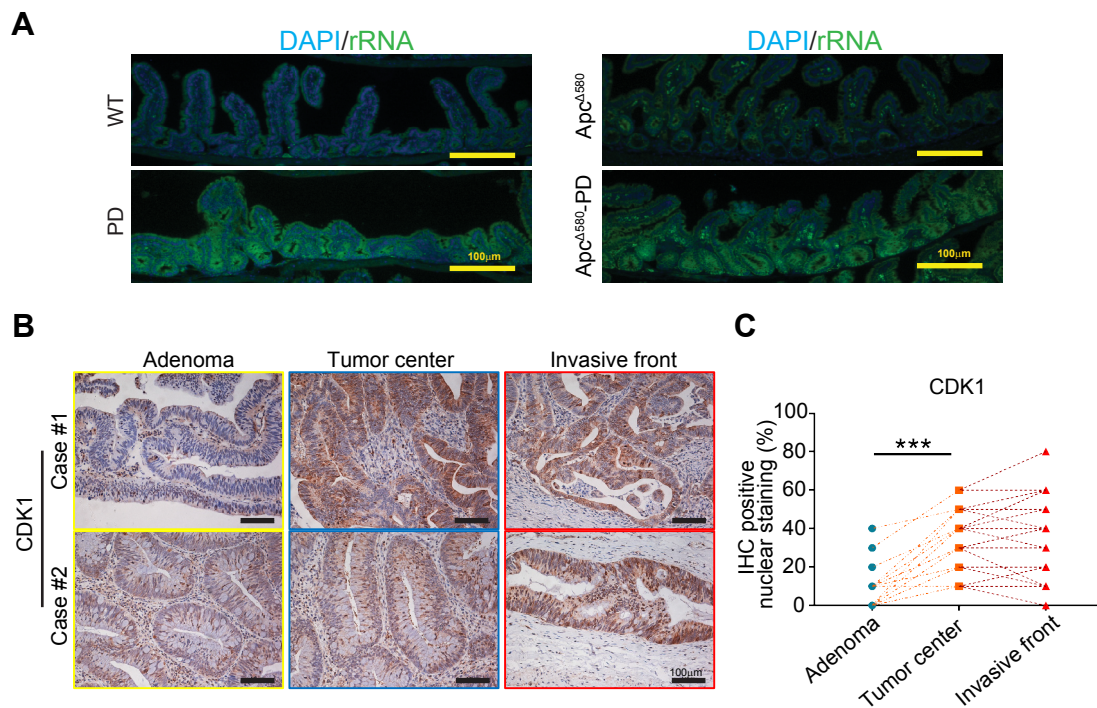

Figure S6

rRNA expression in mouse intestinal tissues and CDK1 expression in human colorectal cancer invasive fronts. **A**, Immunofluorescence staining of rRNA using Y10b antibody (Green) for the intestinal tissues from PD and Apc<sup>Δ580</sup>-PD mice and their corresponding control littermates. **B and C**, CDK1 expression in human colorectal cancer invasive front. **B**, Representative CDK1 IHC staining images of human paired colon adenomas, CRC tumor centers, and invasive fronts of 2 patients. **C**, The percentage of positive nuclear CDK1 staining for the paired adenomas, CRC tumor centers, and invasive fronts as described in Figure 4E (n = 41 patients). Data are shown as mean ± SEM. \*\*\**P* < 0.001.



Figure S7

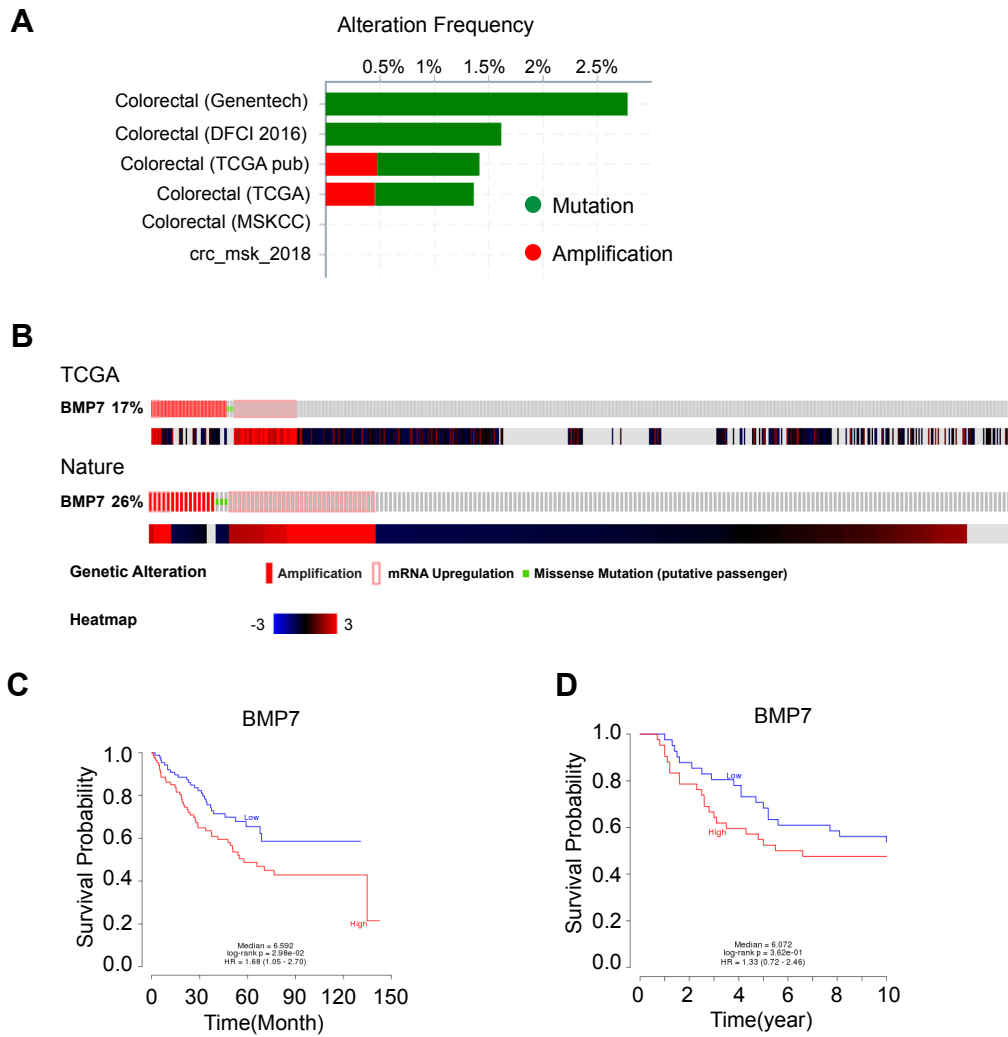

Figure S7

PPARD and BMP7 genetic alterations in colon cancer patients. **A**, PPARD genetic alterations in TCGA colorectal cancer databases. Querying 2395 samples in six studies. **B**, The heatmap of BMP7 genetic alteration analyses (e.g. amplification, mRNA upregulation) of TCGA Colorectal Provisional (629 cases) and Nature public (195 cases) databases. **C and D**, Comparison of the survival probability for the colon cancer patients with low and high expression of BMP7 from analyses of two public databases [**C** (GSE17536) and **D** (GSE24549)] in the PRECOG public database portal.
